# Supplementary material for: Understanding the Deterrence in Medical Insurance Fund Regulatory Systems for Fraud and Abuse Behaviors by Enrollees in China: An Analysis Based on Deterrence Theory
Source: Research Square preprint supplement (doi:10.21203/rs.3.rs-4232000/v1), 2024-04-18
Supplement: Supplementary file 1 [file 35a3db82075360cbe4c3480f.docx]

**Supplementary Appendix**

Appendix Table 1. Calculation of indicators of objective deterrence 1

Appendix Table 2. Enrollees’ Perceived Deterrence Scale (EPDS) 2

Appendix Table 3. The scale scores by dimension 6

Appendix Table 4. Scores for each item of the scale 7

Appendix Figure 1. Score distribution across the dimensions of the EPDS 8

Appendix Figure 2. Overall score distribution of the EPDS 9

# Appendix Table 1. Calculation of indicators of objective deterrence

| **Dimension** | **Indicators** | **Calculation** |
| --- | --- | --- |
| Severity | Variety of regulatory measures | Categories of practical usage measures |
| Intensity of regulatory measures | Number and intensity of means used in cases |
| Certainty | Certainty of detection | Proportion of people investigated in cases |
| Certainty of enforcement | Personnel subject to disciplinary punishment / all Personnel violating laws and regulations*100% |
| Celerity | Celerity of detection | Time (notice printing time) - time (start month and year of pending audit) |
| Celerity of enforcement | Time (printing time of disciplinary decision notification) - time (notice printing time) |

# Appendix Table 2. Enrollees’ Perceived Deterrence Scale (EPDS)

| The following questions are designed to get a sense of how you feel about the current regulatory environment for basic medical insurance, with options 1–5 representing your level of agreement with the statement in the question stem. Please answer all questions according to your own criteria and feelings, and select the option that best fits your situation. If you are not sure how to answer a question, choose the answer that is closest to your true feelings. | | | | | | | | | | | |
| --- | --- | --- | --- | --- | --- | --- | --- | --- | --- | --- | --- |
| **Dimension A. Perceived severity** | | | | | | | | | | | |
| **1** | If I realize that I have violated the medical insurance policy regulations, I will experience significant psychological stress. | | | | | | | | | |  |
|  | Strongly disagree | | Disagree | | | Neutral | | | Agree | | Strongly agree |
|  | 1 |  | 2 |  |  | 3 |  | | 4 |  | 5 |
| **2** | If I violate the medical insurance policy regulations, I may face severe financial penalties. | | | | | | | | | | |
|  | Strongly disagree | | Disagree | | | Neutral | | Agree | | | Strongly agree |
|  | 1 |  | 2 |  |  | 3 |  | 4 | |  | 5 |
| **3** | If I violate the medical insurance policy regulations and the situation is serious, I may be subject to criminal liability. | | | | | | | | | | |
|  | Strongly disagree | | Disagree | | | Neutral | | Agree | | | Strongly agree |
|  | 1 |  | 2 |  |  | 3 |  | 4 | |  | 5 |
| **4** | If my use of medical insurance is restricted due to my violation of medical insurance policy regulations (such as suspension of outpatient and emergency medical insurance settlement, suspension of medical insurance card network settlement, etc.), it will cause me many inconveniences. | | | | | | | | | | |
|  | Strongly disagree | | Disagree | | | Neutral | | Agree | | | Strongly agree |
|  | 1 |  | 2 |  |  | 3 |  | 4 | |  | 5 |
| **5** | If I am subjected to disciplinary punishment for violating medical insurance policy regulations, it will seriously affect my social reputation (such as in the community, workplace, etc.). | | | | | | | | | | |
|  | Strongly disagree | | Disagree | | | Neutral | | Agree | | | Strongly agree |
|  | 1 |  | 2 |  |  | 3 |  | 4 | |  | 5 |
| **Dimension B. Perceived certainty** | | | | | | | | | | | |
| **6** | I believe that if I engage in actions that violate medical insurance policy regulations (such as selling medical insurance drugs, lending or misusing medical insurance cards, forging or altering medical insurance reimbursement materials, etc.), the likelihood of being detected by regulatory authorities will be very high. | | | | | | | | | | |
|  | Strongly disagree | | Disagree | | | Neutral | | Agree | | | Strongly agree |
|  | 1 |  | 2 |  |  | 3 |  | 4 | |  | 5 |
| **7** | I believe that if I engage in actions that violate medical insurance policy regulations (such as selling medical insurance drugs, lending or misusing medical insurance cards, forging or altering medical insurance reimbursement materials, etc.), the likelihood of being subjected to disciplinary action by regulatory authorities will be very high. | | | | | | | | | | |
|  | Strongly disagree | | Disagree | | | Neutral | | Agree | | | Strongly agree |
|  | 1 |  | 2 |  |  | 3 |  | 4 | |  | 5 |
| **Dimension C. Perceived celerity** | | | | | | | | | | | |
| **8** | If I violate the medical insurance policy regulations, I will be immediately discovered. | | | | | | | | | | |
|  | Strongly disagree | | Disagree | | | Neutral | | Agree | | | Strongly agree |
|  | 1 |  | 2 |  |  | 3 |  | 4 | |  | 5 |
| **9** | If I violate the medical insurance policy regulations, I will be punished immediately. | | | | | | | | | | |
|  | Strongly disagree | | Disagree | | | Neutral | | Agree | | | Strongly agree |
|  | 1 |  | 2 |  |  | 3 |  | 4 | |  | 5 |
| **Dimension D. Subjective norm** | | | | | | | | | | | |
| **10** | If I engage in behavior that does not comply with the requirements of the medical insurance policy, I believe that my family members/friends would definitely intervene or report it to the medical insurance department once they find out. | | | | | | | | | | |
|  | Strongly disagree | | Disagree | | | Neutral | | Agree | | | Strongly agree |
|  | 1 |  | 2 |  |  | 3 |  | 4 | |  | 5 |
| **11** | If I engage in behavior that does not comply with the requirements of the medical insurance policy, I believe that the doctor treating me would definitely intervene or report it to the medical insurance department once they find out. | | | | | | | | | | |
|  | Strongly disagree | | Disagree | | | Neutral | | Agree | | | Strongly agree |
|  | 1 |  | 2 |  |  | 3 |  | 4 | |  | 5 |
| **12** | If I engage in behavior that does not comply with the requirements of the medical insurance policy, I believe that other personnel at the medical institution where I receive treatment (such as pharmacists in the pharmacy, nurses, etc.) would definitely intervene or report it to the medical insurance department once they find out. | | | | | | | | | | |
|  | Strongly disagree | | Disagree | | | Neutral | | Agree | | | Strongly agree |
|  | 1 |  | 2 |  |  | 3 |  | 4 | |  | 5 |
| **13** | If I engage in behavior that does not comply with the requirements of the medical insurance policy, I believe that the staff at the hospital's billing window would definitely intervene or report it to the medical insurance department once they find out. | | | | | | | | | | |
|  | Strongly disagree | | Disagree | | | Neutral | | Agree | | | Strongly agree |
|  | 1 |  | 2 |  |  | 3 |  | 4 | |  | 5 |
| **Dimension E. Test items** | | | | | | | | | | | |
| **14** | I have a better understanding of what kind of behavior violates the health insurance regulations (e.g., selling medicines, lending or fraudulent use of the health insurance card, forging or falsifying health insurance reimbursement documents, etc.) when a participant uses the health insurance. | | | | | | | | | | |
|  | Strongly disagree | | Disagree | | | Neutral | | Agree | | | Strongly agree |
|  | 1 |  | 2 |  |  | 3 |  | 4 | |  | 5 |
| **15** | I am aware of the penalties (e.g., refunds, fines, card blocking, etc.) for violating the health insurance policy. | | | | | | | | | | |
|  | Strongly disagree | | Disagree | | | Neutral | | Agree | | | Strongly agree |
|  | 1 |  | 2 |  |  | 3 |  | 4 | |  | 5 |

# Appendix Table 3. The scale scores by dimension

| **Dimension** | **Mean** | **SD** | **25%** | **Median** | **75%** |
| --- | --- | --- | --- | --- | --- |
| **Overall score** | 4.379 | 0.675 | 4.000 | 4.615 | 5.000 |
| Perceived severity | 4.445 | 0.691 | 4.000 | 4.800 | 5.000 |
| Perceived certainty | 4.436 | 0.777 | 4.000 | 5.000 | 5.000 |
| Perceived celerity | 4.225 | 0.905 | 4.000 | 4.500 | 5.000 |
| Subjective norms | 4.346 | 0.796 | 4.000 | 4.750 | 5.000 |

# Appendix Table 4. Scores for each item of the scale

| **Dimension** | **No.** | **Element** | **Score a** | **SD** |
| --- | --- | --- | --- | --- |
| A. Perceived Severity | 1 | Psychological pressure | 4.486 | 0.78 |
| 2 | Economic penalties | 4.413 | 0.816 |
| 3 | Judicial penalties | 4.455 | 0.817 |
| 4 | Benefits restrictions | 4.454 | 0.844 |
| 5 | Deterioration of social reputation | 4.417 | 0.849 |
| B. Perceived Certainty | 6 | Certainty of detection | 4.435 | 0.809 |
| 7 | Certainty of enforcement | 4.436 | 0.823 |
| C. Perceived Celerity | 8 | Celerity of detection | 4.228 | 0.946 |
| 9 | Celerity of enforcement | 4.222 | 0.944 |
| D. Subjective Norms | 10 | Family/relatives | 4.241 | 0.972 |
| 11 | Attending physician | 4.36 | 0.872 |
| 12 | Other staff at the medical institutions (pharmacist in the pharmacy, nurses, etc.) | 4.387 | 0.849 |
| 13 | Hospital billing department staff | 4.398 | 0.838 |
| Note:  a The scores are mean values based on a 5-point Likert scale, where 1 might represent “not at all deterrent” and 5 “extremely deterrent”. | | | | |

# Appendix Figure 1. Score distribution across the dimensions of the EPDS

# Appendix Figure 2. Overall score distribution of the EPDS
